# Supplementary material for: Post-polymerization modification of styrene–maleic anhydride copolymer brushes
Source: Royal Society of Chemistry journal article supplement (doi:10.1039/c7py01659j), 2017-01-01
Supplement: c7py01659j1.pdf [file c7py01659j1.pdf]

## Supporting Information

### Post-polymerization modification of styrene-maleic anhydride copolymer brushes

Wei Guo, Li Xiong, Cassandra M. Reese, Douglas V. Amato, Brittany J. Thompson, Phillip K. Logan, and Derek L. Patton\*

School of Polymer Science and Engineering, University of Southern Mississippi, Hattiesburg, MS 39406

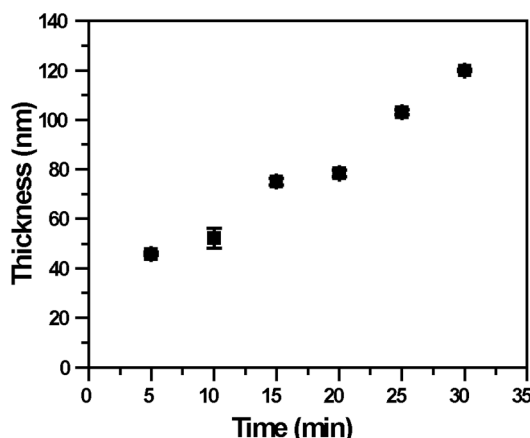

**Fig. S1** Thickness of pSMA brush versus polymerization time.

The thickness values of pSMA brush samples before and after cystamine modification were measured using ellipsometry and the results are summarized in Table 1. The modification of the pSMA brush with cystamine increases the molecular mass of the repeat units and results in an increase in brush thickness. Note, the pSMA brush surfaces were thoroughly rinsed with DI water ( $\text{pH} < 6$ ) prior to thickness measurements. We do not attempt to account for swelling that may arise from electrostatic repulsion of deprotonated carboxylic acid moieties. Anhydride conversions determined from ellipsometry are in good agreement with conversions determined by grazing angle FTIR. Equation S1 describes the relationship between polymer brush thickness,  $T$ , molecular weight of polymer repeat unit,  $M$ , and the mass density,  $\rho$ , of polymer brush before and after modification,<sup>1</sup>

$$\frac{T_2}{T_1} = \frac{M_2 \rho_1}{M_1 \rho_2} \quad \text{Equation S1}$$

where the subscripts 1 and 2 denote the unmodified and cystamine-modified polymer brush, respectively. Assuming equivalent mass density of the polymer brush before and after postmodification, Equation 1 becomes Equation S2, where  $k$  represents conversion and  $M_{PPM}$  denotes the molecular weight of the modifier that reacts onto the polymer chain, respectively.

$$\frac{T_2}{T_1} = \frac{M_2}{M_1} = \frac{M_1 + kM_{PPM}}{M_1} \quad \text{Equation S2}$$

At full conversion, ( $k=100\%$ ), the molecular mass of modifier,  $M_{PPM}$ , was calculated to be 135.06 g/mol, based on Equation S2. The calculated  $M_{PPM}$  is less than the molecular weight of cystamine (152.28 g/mol) which can be attributed to the cystamine molecules that react with polymer brush by two amines. The percentage of cystamine as crosslinker,  $x$ , was calculated to be 12.7%, following Equation

## Supporting Information

S3 in which  $M_{\text{cystamine}}$  is the MW of cystamine (152.28 g/mol). The result suggests that most cystamine molecules reacted with the pSMA brush by only one amine.

$$\chi = \frac{M_{\text{cystamine}} - M_{\text{PPM}}}{M_{\text{PPM}}} \quad \text{Equation S3}$$

The anhydride conversion  $k$  can be calculated according to Equation S4 and the results are shown in Table 1.

$$k = \frac{M_1}{M_{\text{PPM}}} \left( \frac{T_2}{T_1} - 1 \right) \quad \text{Equation S4}$$

**Table S1.** Thickness and conversion of cystamine-modified pSMA brush.

| Time (s) | Before PPM (nm) | After PPM (nm) | Conversion (%) |
|----------|-----------------|----------------|----------------|
| 7        | 82.3±1.2        | 116.7±0.3      | 63±4           |
| 10       | 79.8±0.8        | 118.3±0.6      | 72±4           |
| 15       | 82.8±0.1        | 126.7±0.9      | 80±4           |
| 20       | 82.3±0.3        | 130.7±0.8      | 88±4           |
| 30       | 81.1±0.3        | 131.7±0.6      | 94±5           |
| 45       | 75.0±0.6        | 123.3±0.4      | 97±5           |
| 60       | 76.3±0.6        | 125.5±1.0      | 97±5           |
| 1200     | 76.9±0.7        | 128.1±3.0      | >99            |

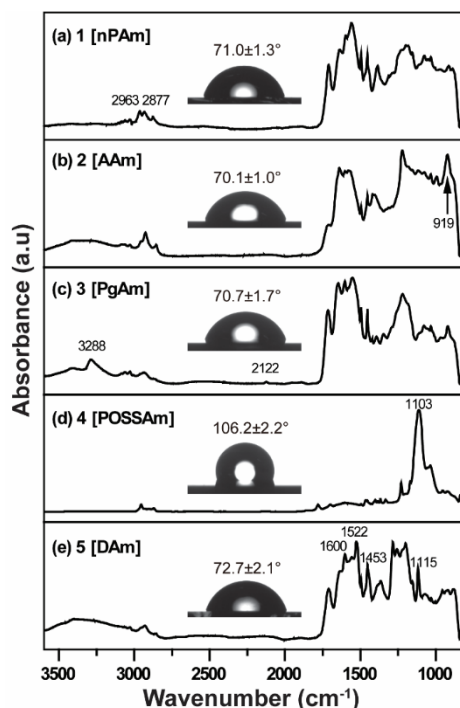

**Fig. S2** Grazing angle ATR-FTIR of pSMA brushes postmodified with (a) propylamine (2963  $\text{cm}^{-1}$  and 2877  $\text{cm}^{-1}$   $\text{-C-H}$  vibrations of methyl groups), (b) allylamine (919  $\text{cm}^{-1}$   $\text{=C-H}$  moiety), (c) propargyl amine (2122  $\text{cm}^{-1}$   $\text{-C}\equiv\text{C-}$  vibration, 3288  $\text{cm}^{-1}$   $\text{\equiv C-H}$ ), (d) aminopropylisobutyl POSS (1103  $\text{cm}^{-1}$   $\text{-Si-O-}$ ), and (e) dopamine hydrochloride (1600  $\text{cm}^{-1}$ , 1522  $\text{cm}^{-1}$ , and 1453  $\text{cm}^{-1}$  aromatic  $\text{-C-H}$  groups, 1115  $\text{cm}^{-1}$  aromatic  $\text{-OH}$  group).

## Supporting Information

**Table S2.** Thickness and conversion of amine modified pSMA brush

|        | Thickness (nm) |                 | Conversion (%) |
|--------|----------------|-----------------|----------------|
|        | pSMA           | After thiol-ene |                |
| PAm    | 78.2±0.1       | 100.3±0.4       | 97±2           |
| AAm    | 93.9±0.7       | 120.7±1.5       | >99            |
| PgAm   | 78.4±0.3       | 99.2±0.5        | 97±3           |
| POSSAm | 46.8±0.3       | 171.9±1.3       | 62±2           |
| DAm    | 78.6±0.4       | 130.2±1.0       | 87±3           |

(1) Murata, H.; Prucker, O.; Ruhe, J. Synthesis of Functionalized Polymer Monolayers from Active Ester Brushes. *Macromolecules* **2007**, 5497-5503.
